# Supplementary material for: Myorelaxation, respiratory depression and electrocardiographic changes caused by the administration of extract of açai (Euterpe oleracea Mart.) stone in rats
Source: PubMed Central journal article supplement — Toxicol Rep. 2021 Mar 31;8:829–38. doi: 10.1016/j.toxrep.2021.03.024 (PMC8044785; doi:10.1016/j.toxrep.2021.03.024), 2021-03-31

## Supplementary Material

Myorelaxation, respiratory depression and electrocardiographic changes caused by the administration of extract of açai (*Euterpe oleracea* Mart.) stone in rats.

Nilton Akio Muto<sup>a</sup>, Moisés Hamoy<sup>b</sup>, David Cristian Rodrigues Lucas<sup>a</sup>, Bruno Brito Teixeira<sup>a</sup>, Adrielle Felicia Santos Almeida<sup>a</sup>, Thamires de Castro Navegantes<sup>b</sup>, Vaniza Sheila de Sousa Ferreira de Sá<sup>b</sup>, Brenda Pinto de Moraes<sup>b</sup>, João Paulo do Vale Medeiros<sup>b</sup>, Yasmin Amorim dos Santos<sup>b</sup>, Cláudia Quintino da Rocha<sup>c</sup>, Vanessa Joia de Mello<sup>b</sup>, Hervé Rogez<sup>a,\*</sup>.

<sup>a</sup>UFPA & Centre for Valorization of Amazonian Bioactive Compounds (CVACBA), Belém, Pará, Brazil

<sup>b</sup>Laboratory of Pharmacology and Toxicology of Natural Products, ICB-UFPA

<sup>c</sup>Laboratory of Chemistry of Natural Products, UFMA

**Fig. S1:** Mass spectrum of compound 1

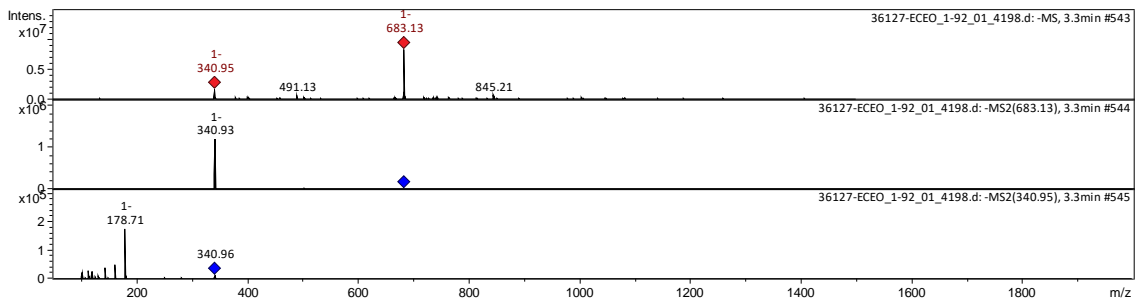

**Fig. S2:** Mass spectrum of compound 2

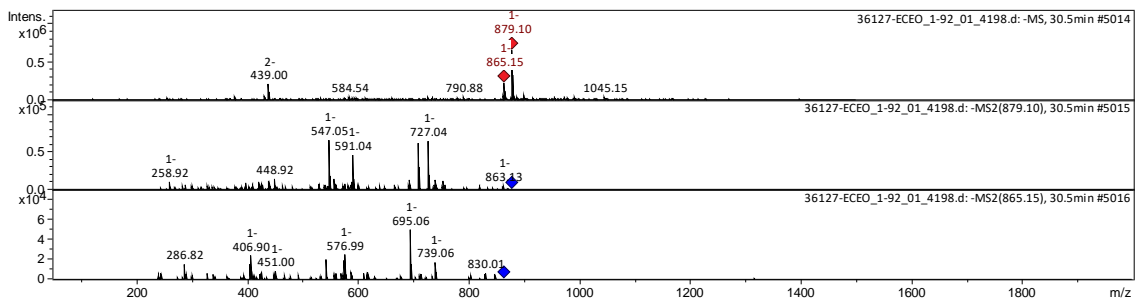

**Fig. S3: Mass spectrum of compound 3**

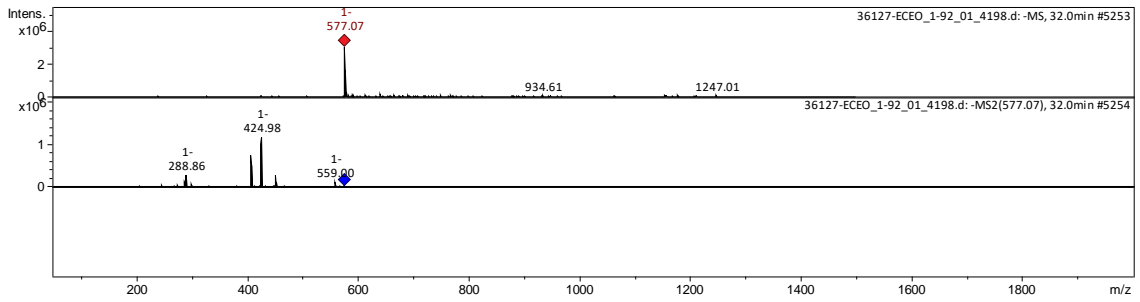

**Fig. S4: Mass spectrum of compound 4**

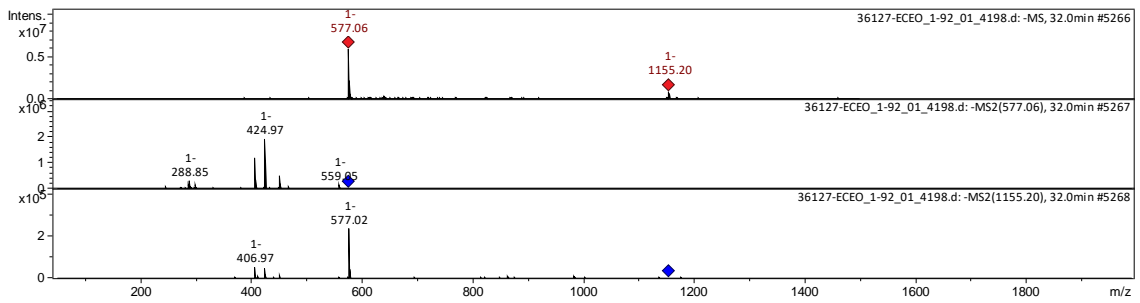

**Fig. S5: Mass spectrum of compound 5**

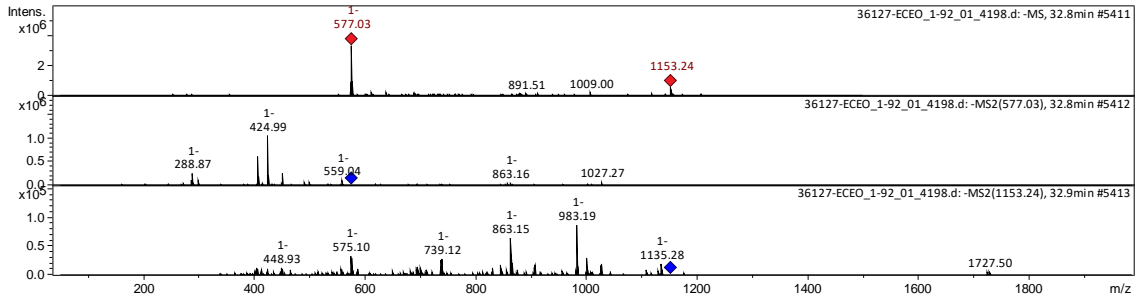

**Fig. S6: Mass spectrum of compound 6**

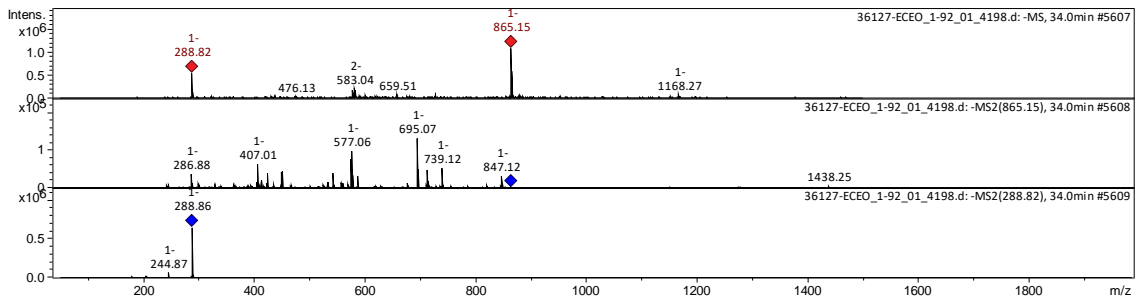

**Fig. S7: Mass spectrum of compound 7**

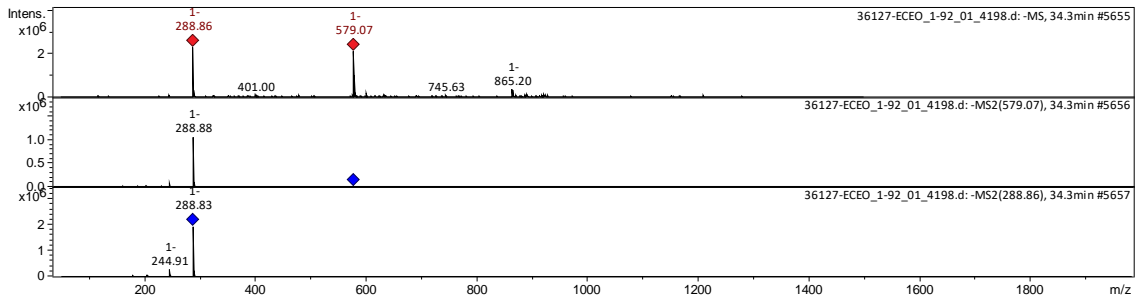

**Fig. S8: Mass spectrum of compound 8**

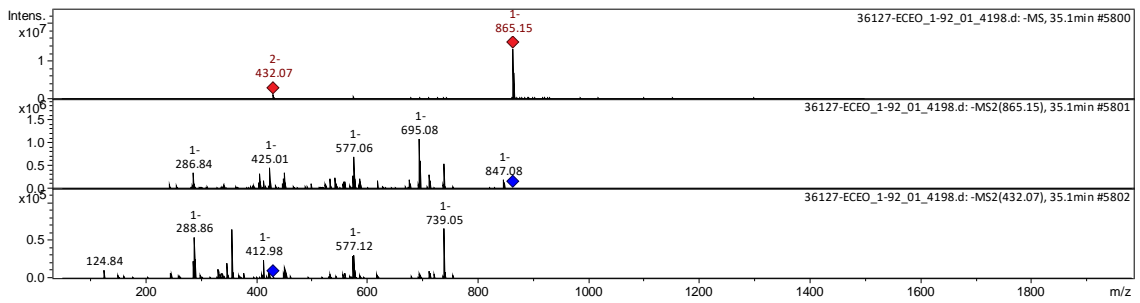

**Fig. S9: Mass spectrum of compound 9**

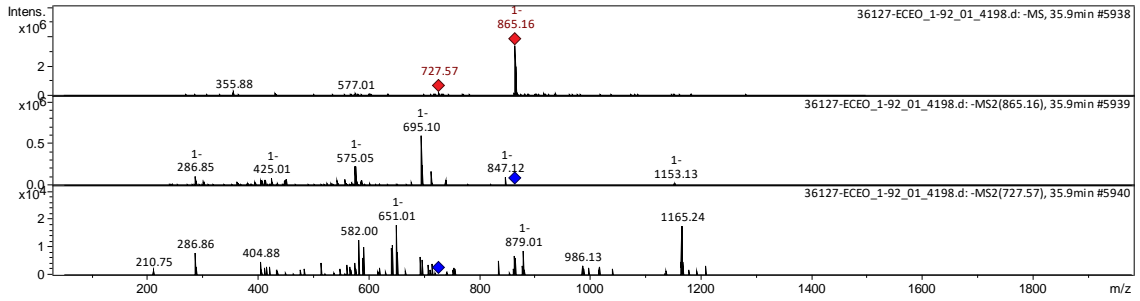

**Fig. S10: Mass spectrum of compound 10**

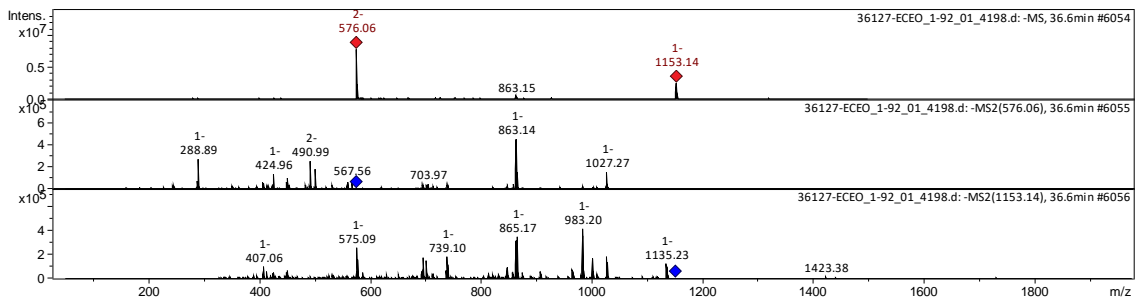

**Fig. S11:** Mass spectrum of compound 11

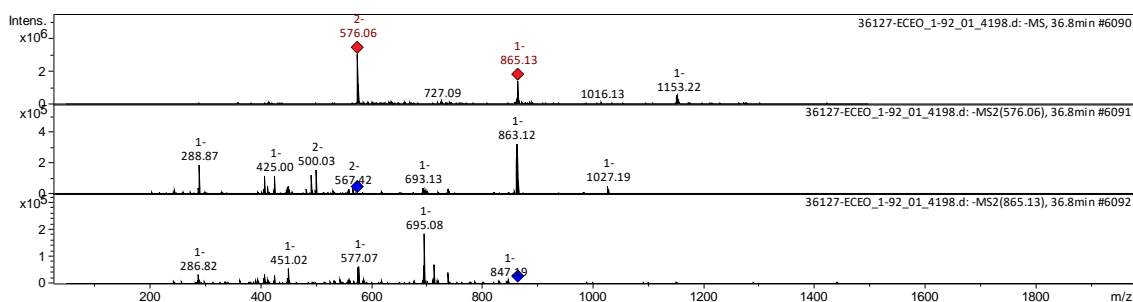

**Fig. S12:** Mass spectrum of compound 12

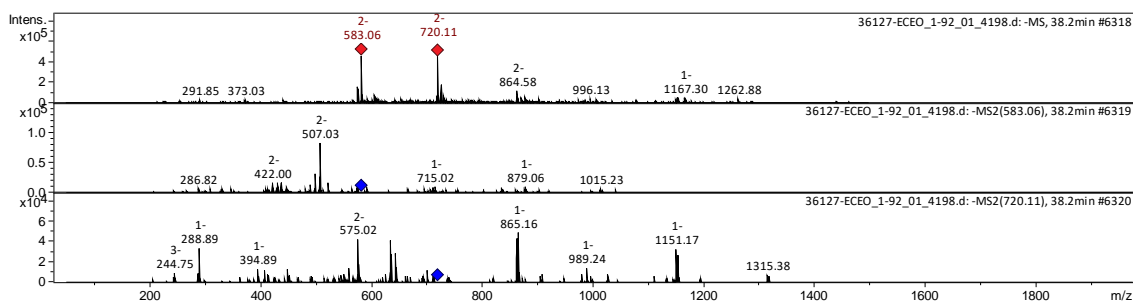

**Fig. S13:** Mass spectrum of compound 13

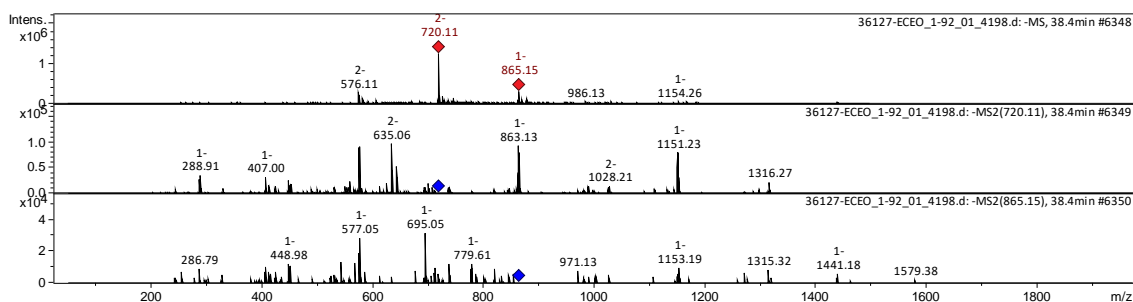

**Fig. S14:** Mass spectrum of compound 14

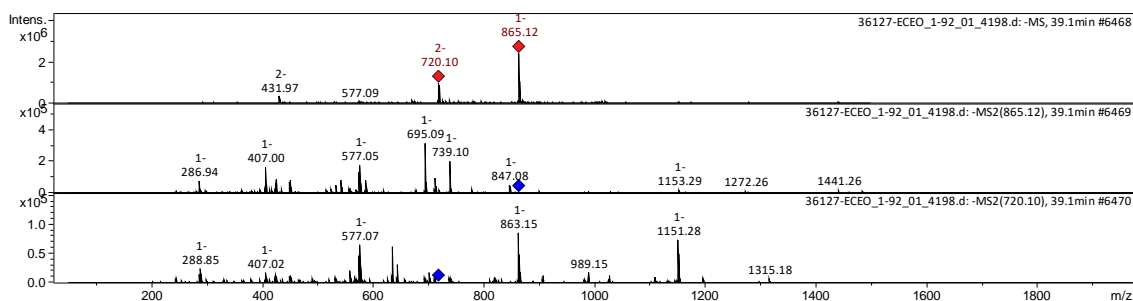

**Fig. S15:** Mass spectrum of compound 15

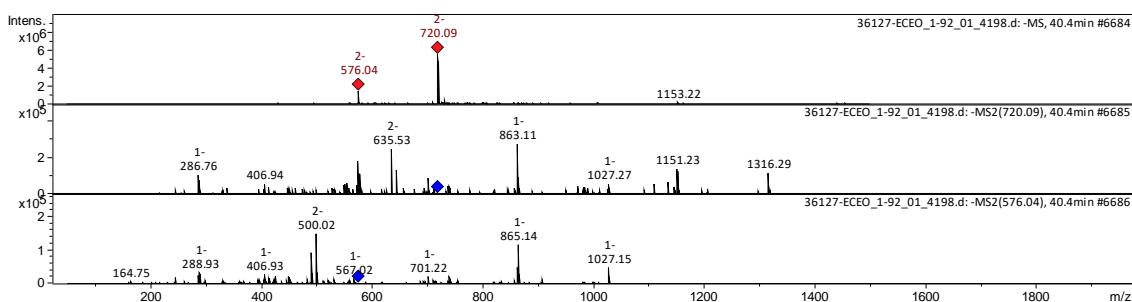

**Fig. S16:** Mass spectrum of compound 16

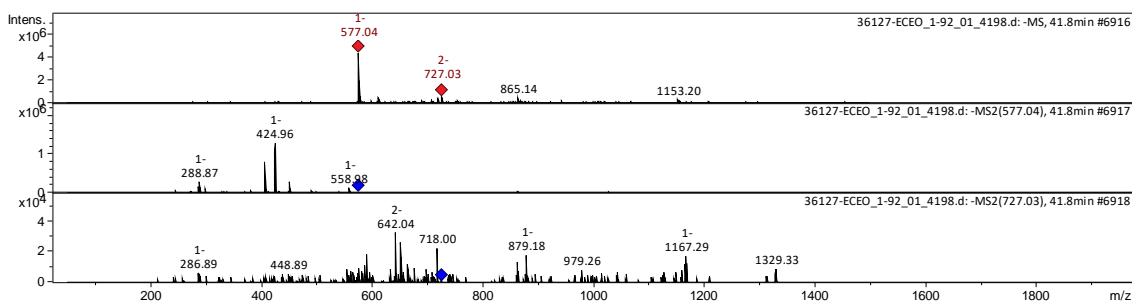

**Fig. S17:** Mass spectrum of compound 17

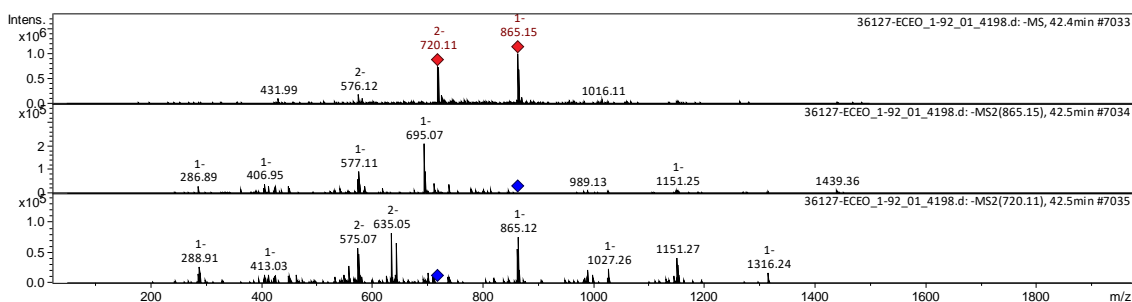

**Fig. S18:** Mass spectrum of compound 18

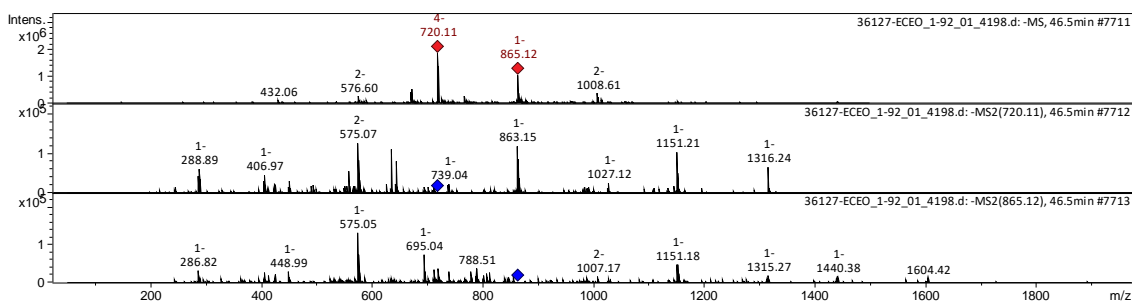

**Fig. S19: Mass spectrum of compound 19**

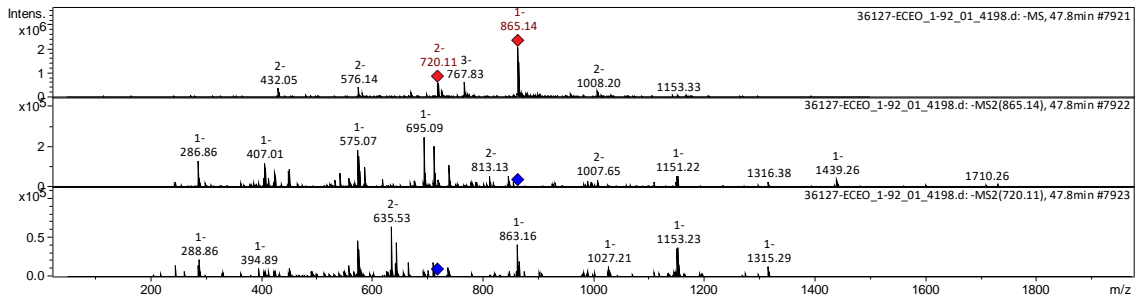

**Fig. S20: Mass spectrum of compound 20**

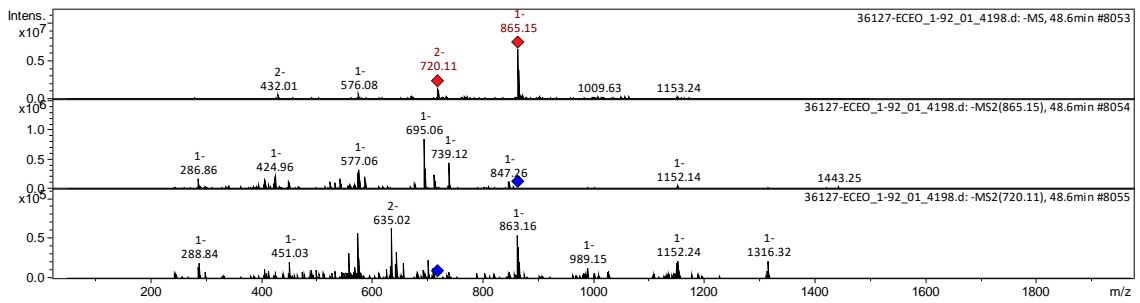

**Fig. S21: Mass spectrum of compound 21**

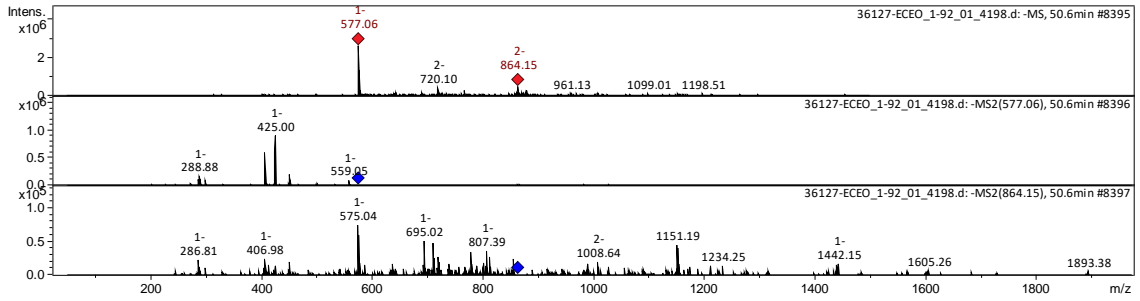

Supplement: mmc1.pdf [file mmc1.pdf]
